# Supplementary material for: Hepatocytic expression of human sodium-taurocholate cotransporting polypeptide enables hepatitis B virus infection of macaques
Source: Springer Nature journal article supplement (doi:10.1038/s41467-017-01953-y), 2017-12-11
Supplement: MOESM1 [file 41467_2017_1953_MOESM1_ESM.pdf › 41467_2017_1953_MOESM1_ESM.pdf]

Supplementary Figure 1.

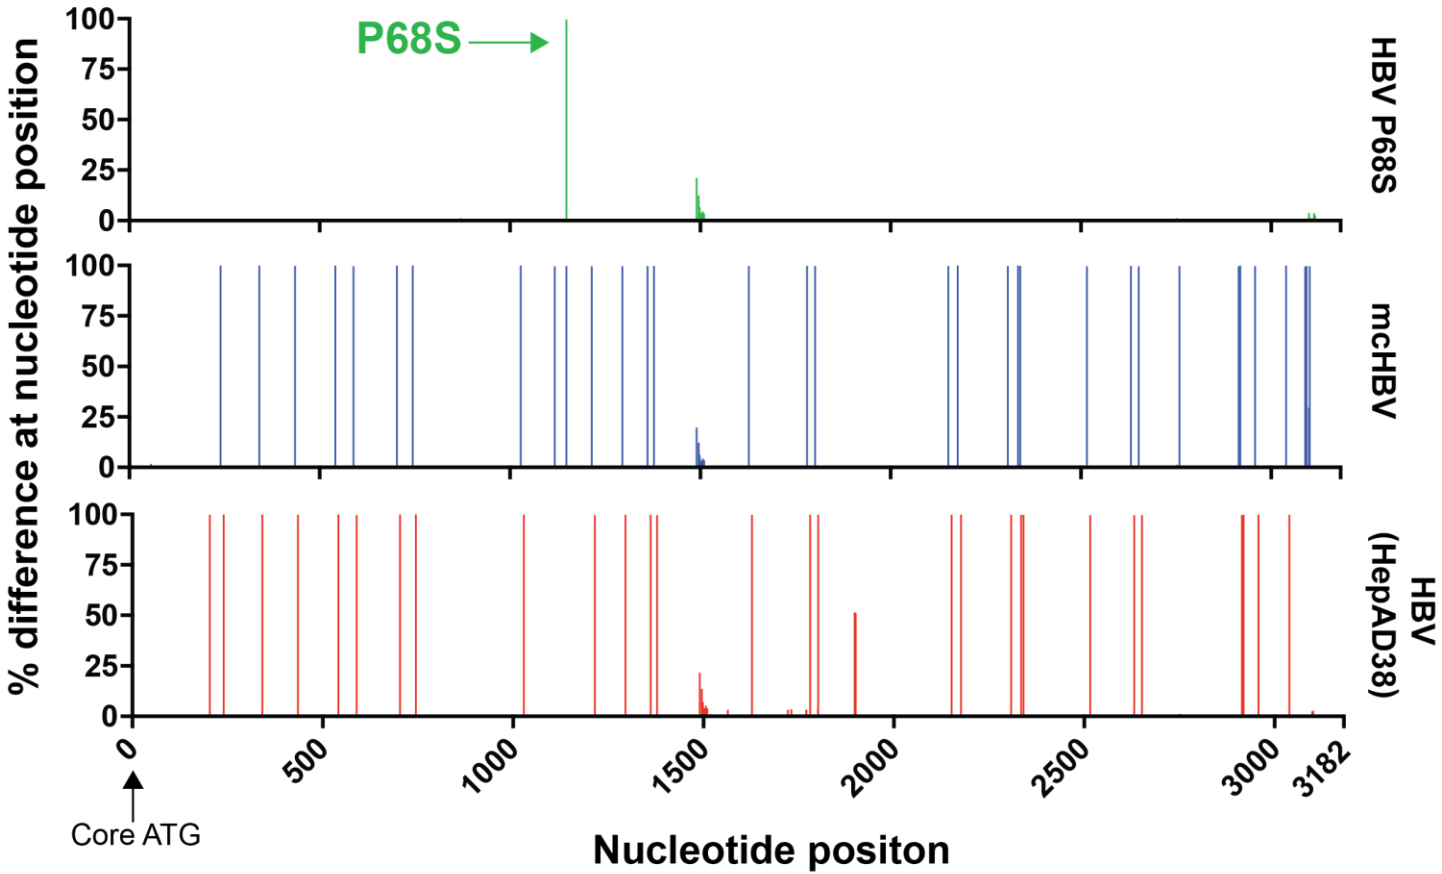

**Supplementary Figure 1. Deep sequencing of HBV stocks.** HBV stocks were PCR amplified using overlapping amplicons and deep sequenced using an Illumina MiSeq. Reads were aligned against the HBV genotype D serotype ayw described in Pasek *et al.*<sup>26</sup>. Colored spikes represent the fraction of reads that differ from the reference at each nucleotide position. Nucleotides are numbered beginning with the adenine of the HBV core ATG start codon.

## Supplementary Figure 2.

Rhesus macaque PH supernatant - HDAd (10x dilution)

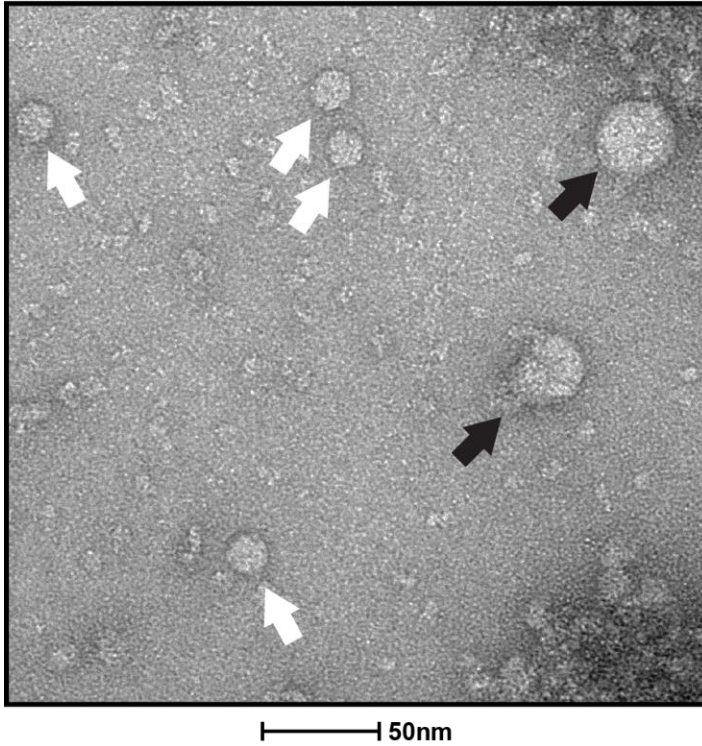

Rhesus macaque PH supernatant - AAV8 (10x dilution)

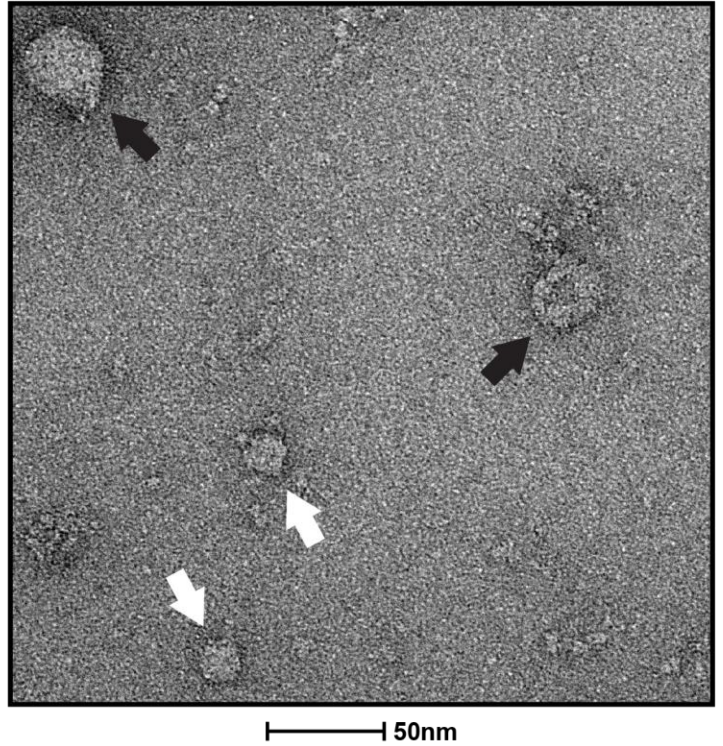

**Supplementary Figure 2. Electron microscopy of Dane particles secreted from HBV-infected rhesus macaque PH.** Left - Rhesus macaque PH treated with HDAd-hNTCP. Right - Rhesus macaque PH treated with AAV8-hNTCP. Black arrow = Dane particle. White arrow = Spherical bodies consistent with virion-like HBsAg particles lacking HBV DNA and core.

Supplementary Figure 3.

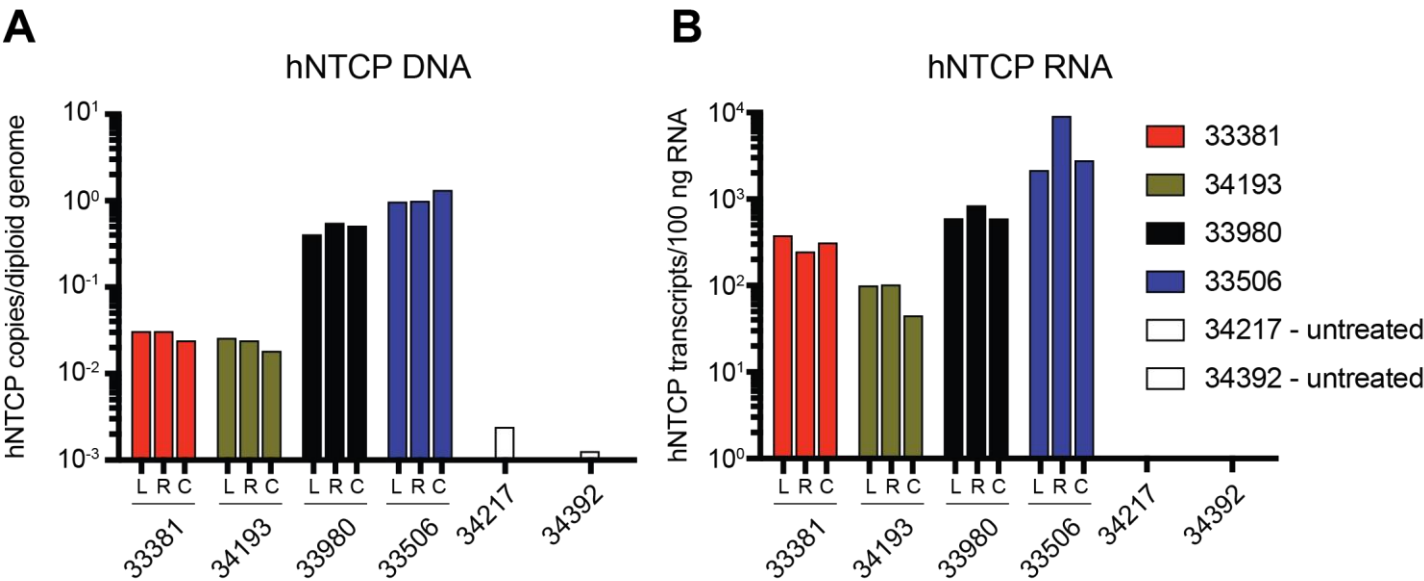

**Supplementary Figure 3. Analysis of liver transduction and hNTCP expression.** A) qPCR for hNTCP DNA shows low transduction levels as assessed by hNTCP DNA copies per diploid genome. B) qRT-PCR for hNTCP RNA shows expression of hNTCP in all animals in all liver lobes assessed. L = left liver lobe; R = right liver lobe; C = caudate liver lobe.

Supplementary Figure 4.

A

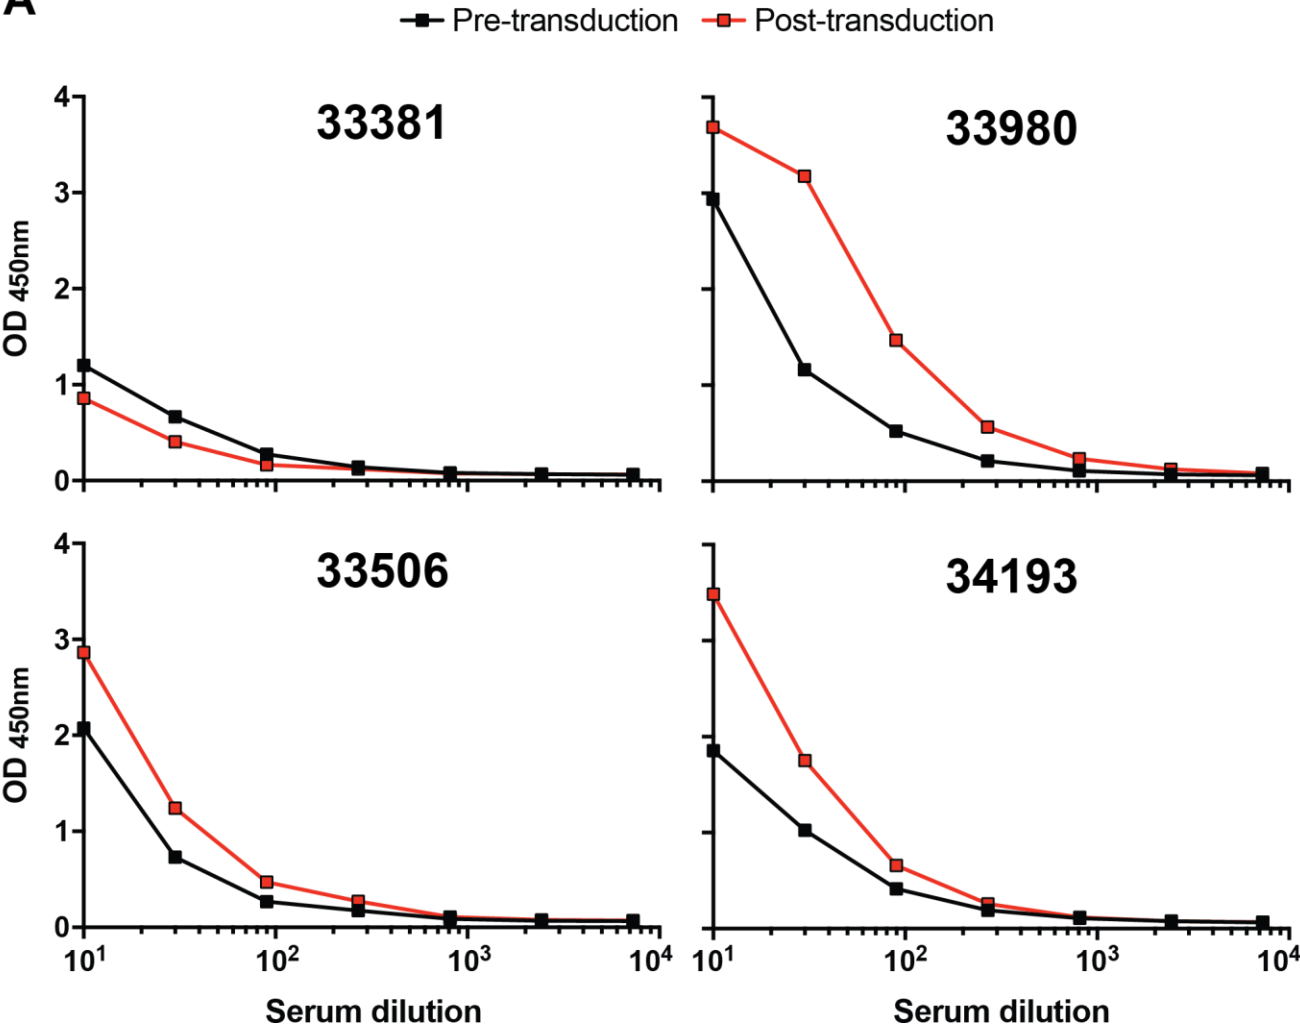

B

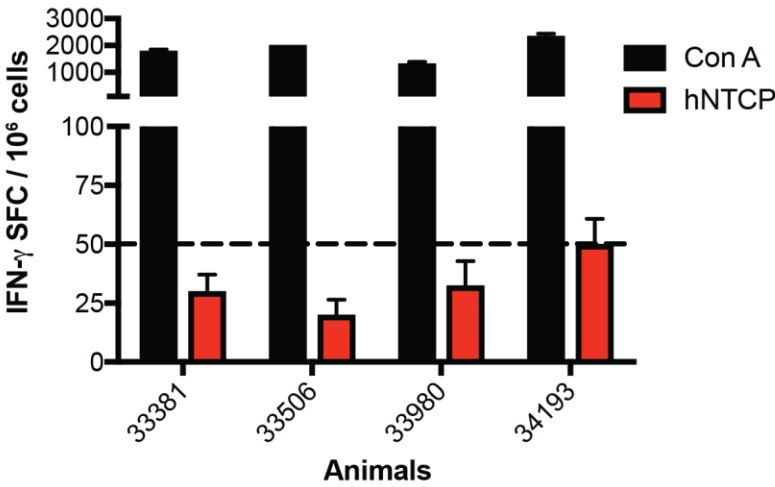

**Supplementary Figure 4. Measurement of anti-hNTCP immune responses.**

A) Anti-hNTCP ELISA using HBV-infected rhesus macaque serum. Positive signal was defined as 3-fold increase in OD 450nm over pre-transduction at each serum dilution. No animals exhibited hNTCP specific humoral responses. B) ELISpot results show no cellular responses against recombinant hNTCP above assay limit of detection (50 IFN- $\gamma$  SFC/ $10^6$  cells). SFC = spot-forming cells. Con A = concanavalin A (positive control). Bars represent standard error of measurement from two ELISpot replicates.

## Supplementary Figure 5.

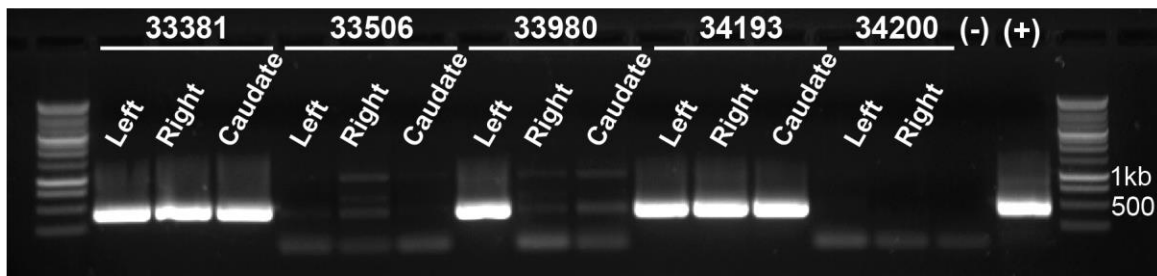

**Supplementary Figure 5. Nested PCR shows presence of HBV DNA in liver sections obtained from HBV-infected rhesus macaques.** (-) negative control with no template. (+) positive control with HBV DNA template extracted from high-titer stock of HBV.

**Supplementary Table 1. Competitive anti-HBc ELISA of MCM cohort at ONPRC**

| ONPRC MCM ID    | Optical Density (450nm) |
|-----------------|-------------------------|
| 32843           | 1.415                   |
| 32844           | 1.507                   |
| 32845           | 1.436                   |
| 32846           | 0.615                   |
| 32847           | 0.734                   |
| 32848           | 0.747                   |
| 32849           | 0.473                   |
| 32850           | 1.077                   |
| 32851           | 1.176                   |
| 33450           | 0.925                   |
| 33454           | 0.848                   |
| 33455           | 1.425                   |
| 33457           | 0.321                   |
| 33460           | 1.403                   |
| 33461           | 1.276                   |
| 34067           | 0.688                   |
| 34068           | 0.417                   |
| 34661           | 1.317                   |
| 34662           | 1.196                   |
| 34663           | 1.234                   |
| 34664           | 0.389                   |
| 34665           | 1.200                   |
| 34666           | 1.414                   |
| 34668           | 1.276                   |
| 34669           | 1.246                   |
| 34670           | 1.073                   |
| 34837           | 0.686                   |
| Negative (mean) | 1.422                   |
| Positive (mean) | 0.010                   |
| Cutoff          | 0.284                   |

|          |
|----------|
| negative |
| positive |

**Supplementary Table 2. Competitive anti-HBc ELISA of HBV-challenged MCM at ONPRC**

| MCM                       | Optical Density 450nm |        |
|---------------------------|-----------------------|--------|
|                           | Day 0                 | Day 56 |
| 33451 (HBV P68S)          | 1.332                 | 1.351  |
| 33453 (HBV P68S / CD3-IT) | 0.993                 | 1.024  |
| 34084 (mcHBV)             | n.d.                  | 1.107  |
| 34079 (mcHBV / CD3-IT)    | 1.432                 | 1.484  |
| Negative (mean)           | 1.680                 |        |
| Positive (mean)           | 0.01                  |        |
| Cutoff                    | 0.336                 |        |

|          |
|----------|
| negative |
| positive |

**Supplementary Table 3. Competitive anti-HBc ELISA of HBV-challenged rhesus macaques at ONPRC**

|                 | Optical Density 450nm |        |
|-----------------|-----------------------|--------|
| Rhesus macaque  | Day 0                 | Day 56 |
| 33506 (AAV)     | 1.832                 | 0.055  |
| 33980 (AAV)     | 1.488                 | 1.434  |
| 33381 (HdAd)    | 1.291                 | 1.517  |
| 34193 (HdAd)    | 1.341                 | 1.377  |
| Negative (mean) | 1.680                 |        |
| Positive (mean) | 0.01                  |        |
| Cutoff          | 0.336                 |        |

|          |
|----------|
| negative |
| positive |



**Supplementary Table 4. Serology markers in HBV-challenged rhesus macaques****Anti-HBe measurements (relative detection)**

| Sample | S/CO  | Reactivity  |
|--------|-------|-------------|
| 33381  | 1.75  | Nonreactive |
| 34193  | 1.90  | Nonreactive |
| 33506  | 2.01  | Nonreactive |
| 33980  | 2.01  | Nonreactive |
| Cutoff | ≤1.00 | -           |

**Anti-HBs measurements (absolute detection of antibodies)**

| Sample | mIU/ml |
|--------|--------|
| 33381  | 0.00   |
| 34193  | 0.00   |
| 33506  | 0.00   |
| 33980  | 0.00   |

**HBsAg measurements (relative detection)**

| Sample | S/CO  | Reactivity  |
|--------|-------|-------------|
| 33381  | 0.71  | Nonreactive |
| 34193  | 0.17  | Nonreactive |
| 33506  | 0.15  | Nonreactive |
| 33980  | 0.20  | Nonreactive |
| Cutoff | ≥1.00 | -           |
